# Supplementary material for: Effects of spatial topologies and electron Fermi-level gradient on the photocatalytic efficiency of nano-particulate semiconductors
Source: Royal Society of Chemistry journal article supplement (doi:10.1039/c7cp00574a), 2017-01-01
Supplement: c7cp00574a1.pdf [file c7cp00574a1.pdf]

# Effects of Geometrical Topologies and Electron Fermi-level Gradient on the Photocatalytic Efficiency in Semiconductor Nano-particulate Photocatalysis

Baoshun liu, Rui Zhao

State Key Laboratory of Silicate Materials for Architectures Institution: Wuhan  
University of Technology, Wuhan City, Hubei province 430070, P. R. China, E-mail:  
[liubaoshun@126.com](mailto:liubaoshun@126.com)

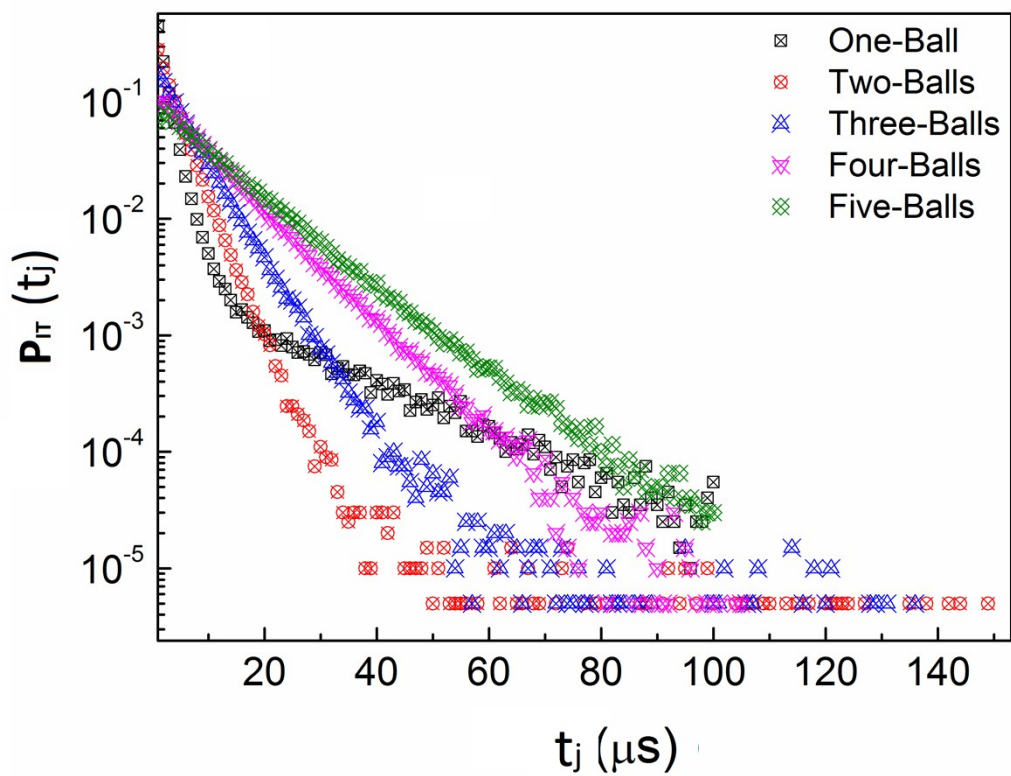

Figure S1  $p_{IT}(t_j)$  of 0-D configuration and 1-D configuration with ball number from 2 to 5 (simulation parameter:  $t_1 = 0.2$ ,  $p_{IPT} = 1.0$ );

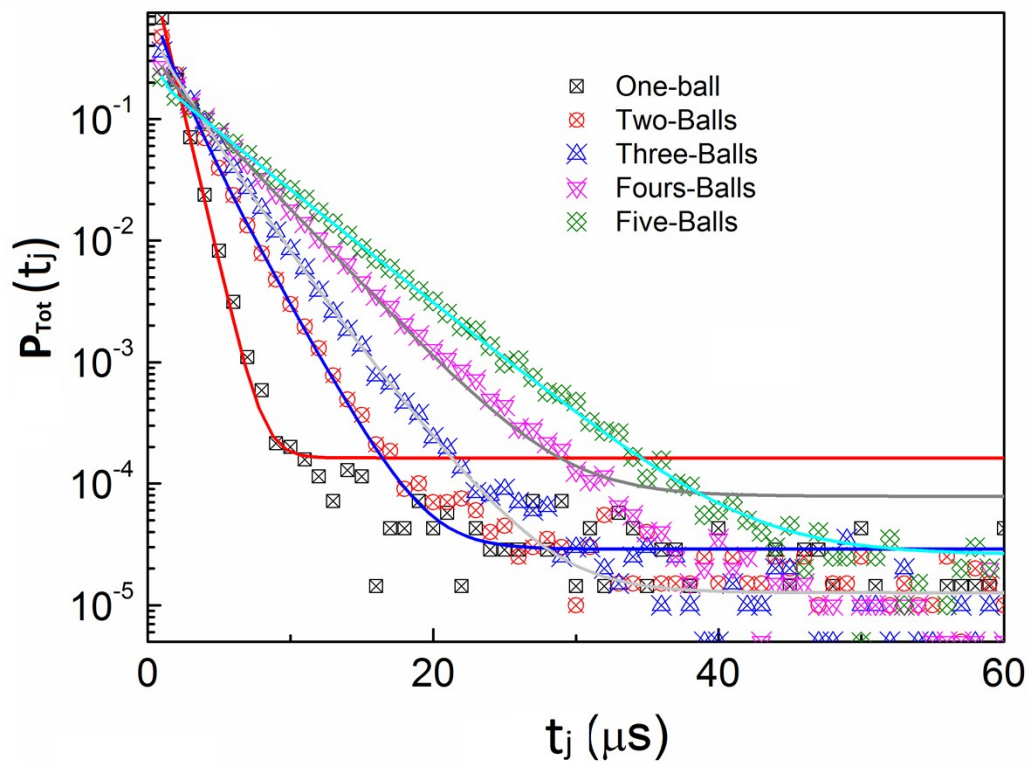

Figure S2  $p_{\text{tot}}(t_j)$  of 0-D configuration and 1-D configuration with ball number from 2

to 5 (simulation parameter:  $t_1 = 0.2$ ,  $p_{\text{IPT}} = 1.0$ );

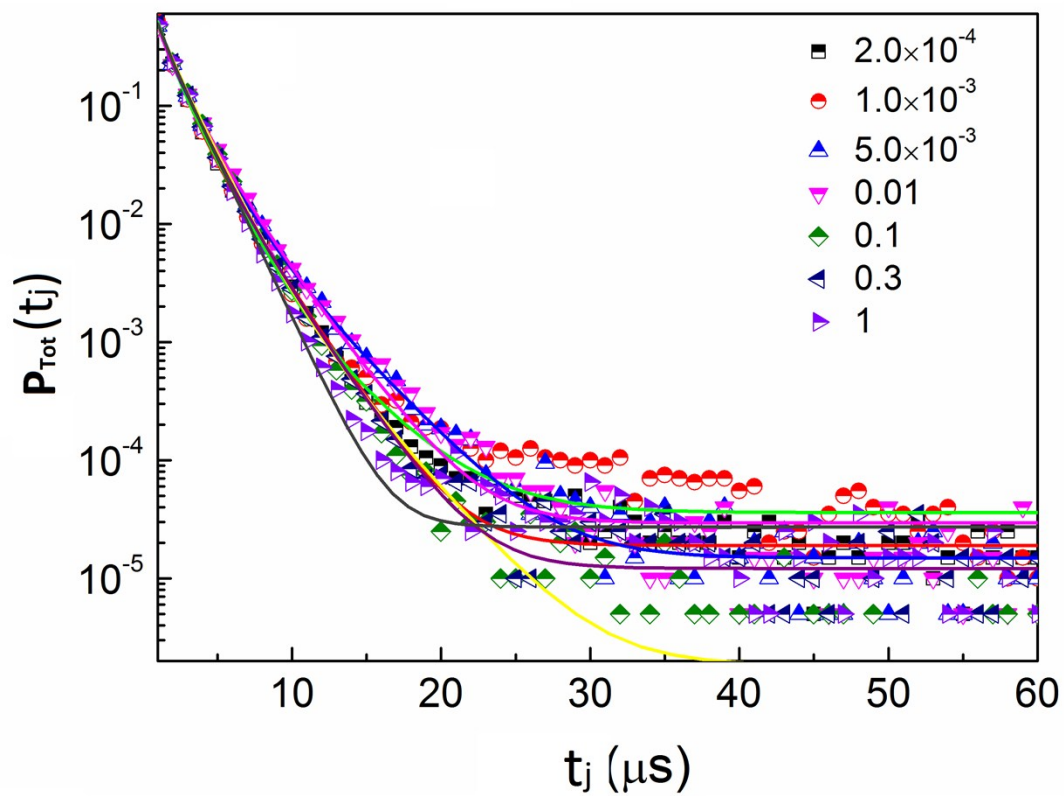

Figure S3  $p_{\text{Tot}}(t_j)$  of two ball 1-D configuration with the various  $p_{\text{IPT}}$  from  $2.0 \times 10^{-4}$  to 1.0 (simulation parameter:  $t_1 = 0.1$ );

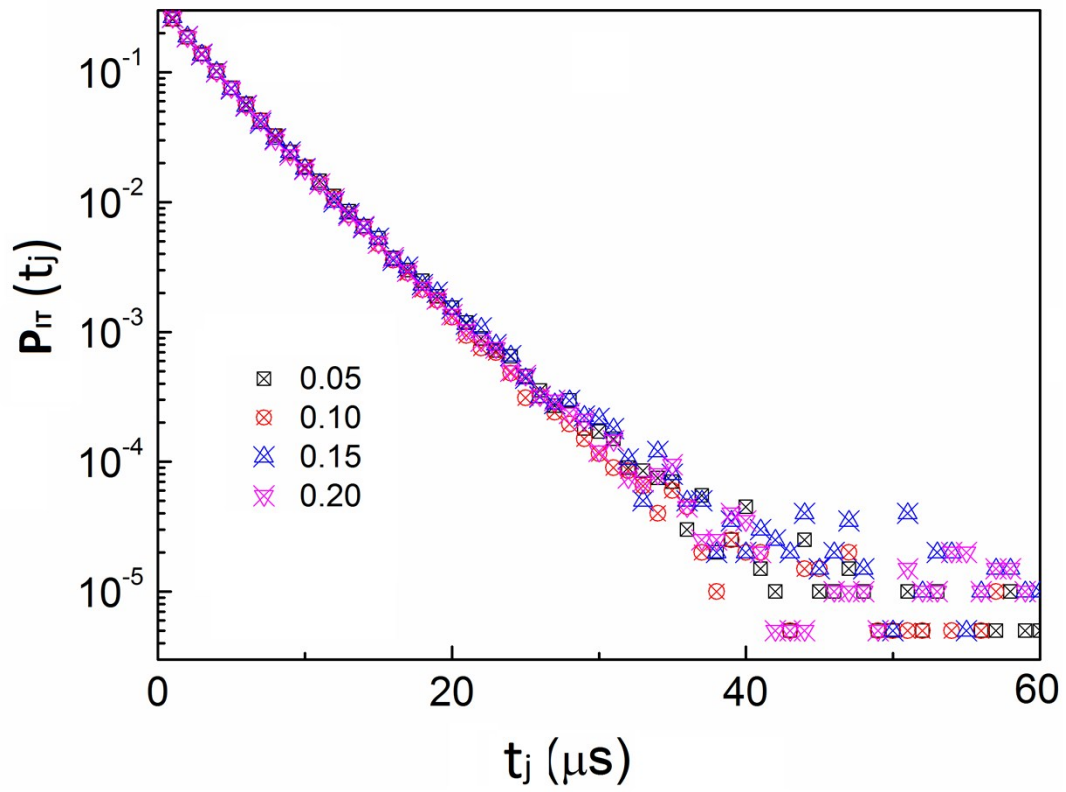

Figure S4  $p_{it}(t_j)$  of two ball 1-D configuration with different interconnection ( $\theta$ )

(simulation parameter:  $\rho_{IPT} = 1.0$ );

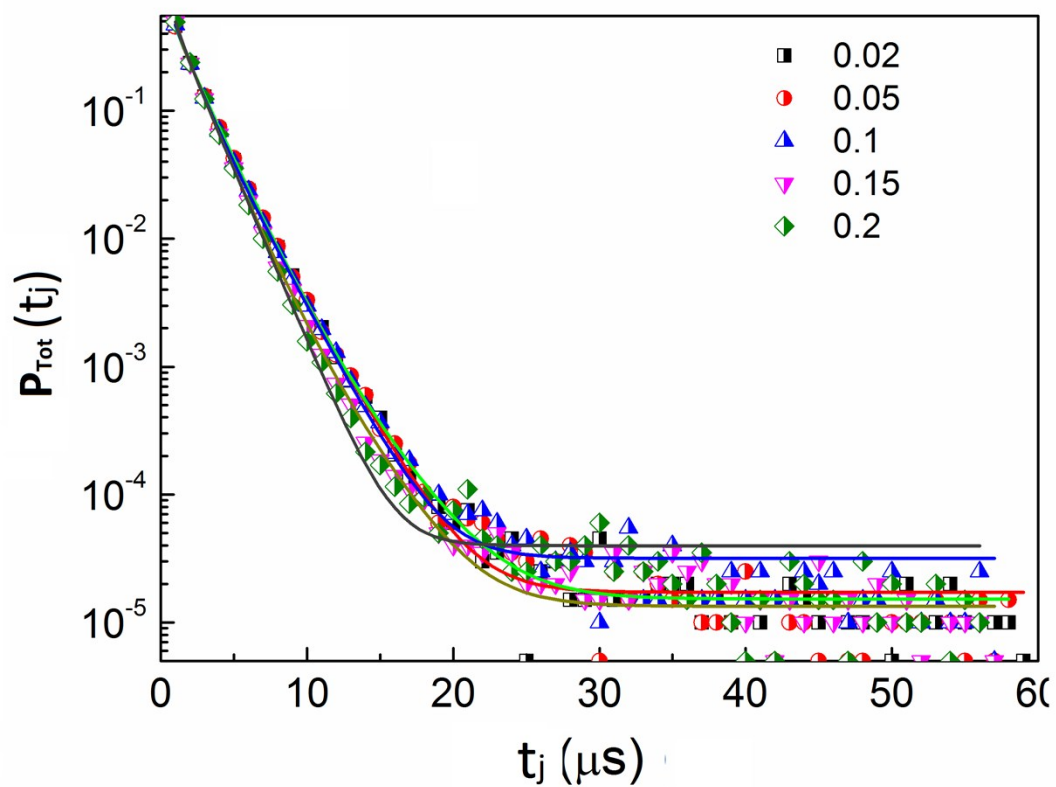

Figure S5  $p_{\text{Tot}}(t_j)$  of two ball 1-D configuration with different interconnection ( $\theta$ )

(simulation parameter:  $p_{\text{IPT}} = 1.0$ );

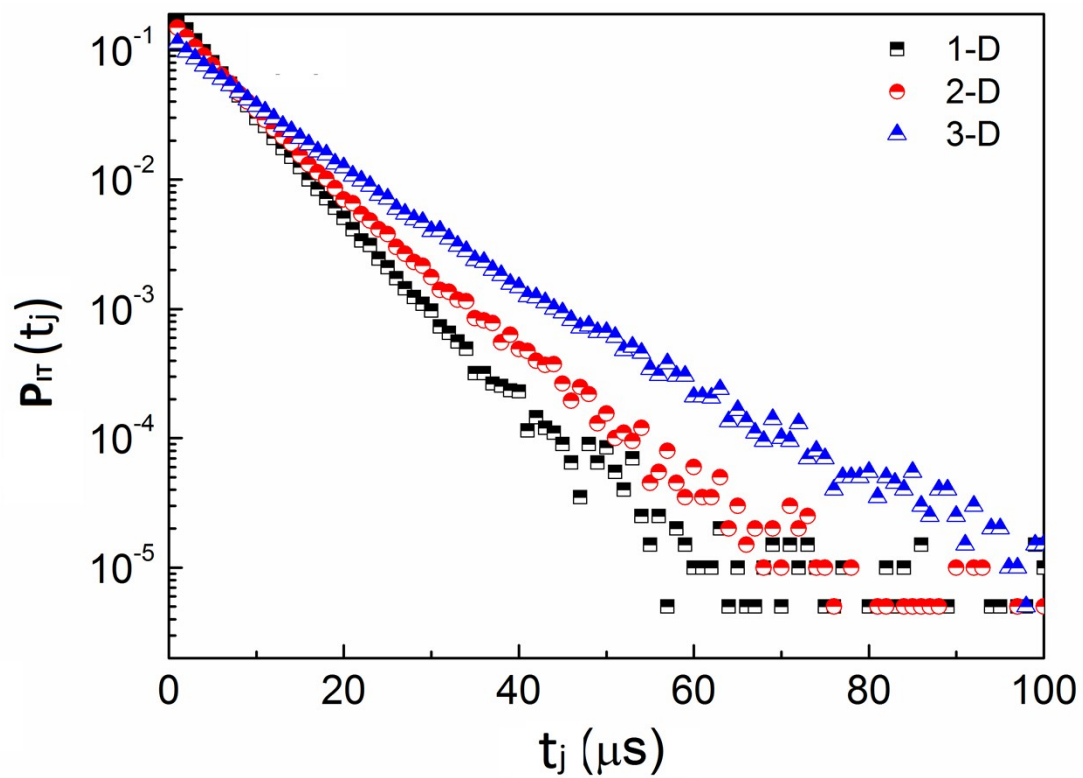

Figure S6  $P_{IR}(t_j)$  of 0-D, 1-D, 2-D configurations shown in Fig. 2 (simulation

parameter:  $\theta = 0.2$ ,  $p_{IPT} = 1.0$ )

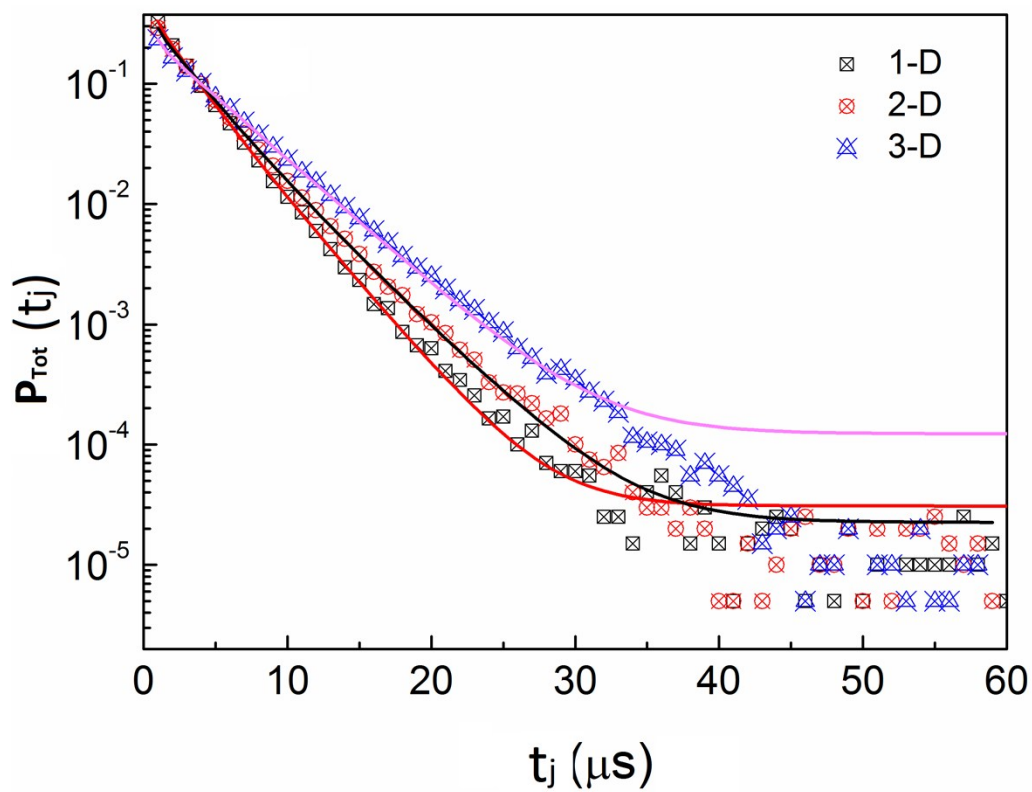

Figure S7  $P_{\text{Tot}}(t_j)$  of 0-D, 1-D, 2-D configurations shown in Fig. 2 (simulation

parameter:  $\theta = 0.2$ ,  $p_{\text{IPT}} = 1.0$ )
